# Supplementary material
Source: publisher figshare collection journal article supplement (https://asha.figshare.com/articles/dataset/_/23949105)
Supplement: Supplementary file 1 [file 1]

**Supplemental Material S3. Rating definitions.****Reliability of expert diagnosis of apraxia of speech in children.  
Rating definitions sheet.**

| Feature category                                           | Subordinate features (if selected as present)                                                                      | Definitions                                                                                                                                                                                            | Rating                                                                                                            |
|------------------------------------------------------------|--------------------------------------------------------------------------------------------------------------------|--------------------------------------------------------------------------------------------------------------------------------------------------------------------------------------------------------|-------------------------------------------------------------------------------------------------------------------|
| <b>Inconsistency</b>                                       | Inconsistent substitutions or distortions of consonants and/or vowels across repeated productions of a word/phrase | Perceptibly different consonants and/or vowels across repeated words or phrases                                                                                                                        | 2 = of significant clinical concern, 1 = of mild clinical concern, 0 = of no clinical concern, 9 = no opportunity |
|                                                            | Variable productions of consonants or vowels across a variety of words                                             | Consonants and vowels change from word to word or phrase to phrase                                                                                                                                     | 2 = of significant clinical concern, 1 = of mild clinical concern, 0 = of no clinical concern, 9 = no opportunity |
| <b>Lengthened and disrupted coarticulatory transitions</b> | Difficulty achieving initial articulatory configuration/ speech groping                                            | Visible effort (e.g., groping) before or at onset of word/phrase.                                                                                                                                      | 2 = of significant clinical concern, 1 = of mild clinical concern, 0 = of no clinical concern, 9 = no opportunity |
|                                                            | Syllable segregation (inappropriate within-word pauses)                                                            | Pauses or gaps within a multisyllabic word. Gaps are longer than would be expected for a typical stop consonant.                                                                                       | 2 = of significant clinical concern, 1 = of mild clinical concern, 0 = of no clinical concern, 9 = no opportunity |
|                                                            | Inappropriate pauses between words                                                                                 | Pauses or gaps between words in connected speech that are not appropriate (e.g., due to syntactic boundaries).                                                                                         | 2 = of significant clinical concern, 1 = of mild clinical concern, 0 = of no clinical concern, 9 = no opportunity |
|                                                            | Increasing difficulty with longer/ more complex words                                                              | Segmental and suprasegmental errors increase as word or phrasal complexity (e.g., number of syllables) increases.                                                                                      | 2 = of significant clinical concern, 1 = of mild clinical concern, 0 = of no clinical concern, 9 = no opportunity |
|                                                            | Articulatory errors or sequencing errors <b>on DDK</b>                                                             | <b>Assessing only the DDK task:</b><br>Consonants/vowels/syllables produced in the wrong order and/or difficulty producing or maintaining a fully correct multisyllable sequence over repeated trials. | 2 = of significant clinical concern, 1 = of mild clinical concern, 0 = of no clinical concern, 9 = no opportunity |
|                                                            | Slow / effortful DDK                                                                                               | <b>Assessing only the DDK task:</b><br>Increased duration of syllables and/or pauses between syllables in relation to the child's age.                                                                 | 2 = of significant clinical concern, 1 = of mild clinical concern, 0 = of no clinical concern, 9 = no opportunity |
| <b>Respiration, voice or resonance errors</b>              | Respiration problems                                                                                               | For example and not limited to: inappropriate breathing depth, rhythm, effort, loudness, spacing (e.g., mid-word), timing (e.g. breathing too frequently).                                             | 2 = of significant clinical concern, 1 = of mild clinical concern, 0 = of no clinical concern, 9 = no opportunity |
|                                                            | Hoarse, harsh and/or breathy voice                                                                                 | Perceived roughness, raspiness, breathiness in voice quality.                                                                                                                                          | 2 = of significant clinical concern, 1 = of mild clinical concern, 0 = of no clinical concern, 9 = no opportunity |
|                                                            | Age-inappropriate pitch                                                                                            | Pitch too high or too low for age.                                                                                                                                                                     | 2 = of significant clinical concern, 1 = of mild clinical concern, 0 = of no clinical concern, 9 = no opportunity |
|                                                            | Age-inappropriate loudness                                                                                         | Too loud or too soft for age, not attributable to emotional content such as excitement.                                                                                                                | 2 = of significant clinical concern, 1 = of mild clinical concern, 0 = of no clinical concern, 9 = no opportunity |
|                                                            | Pitch breaks                                                                                                       | Sudden shift (up or down) in pitch.                                                                                                                                                                    | 2 = of significant clinical concern, 1 = of mild clinical concern, 0 = of no clinical concern, 9 = no opportunity |
|                                                            | Hypernasal (consistent)                                                                                            | Hypernasality (too much nasal airflow) occurs consistently and persists across all consonants and vowels. Includes nasal emission.                                                                     | 2 = of significant clinical concern, 1 = of mild clinical concern, 0 = of no clinical concern, 9 = no opportunity |
|                                                            | Hypernasal (intermittent)                                                                                          | Hypernasality (too much nasal airflow) is present occasionally or intermittently on Cs and/or Vs, but is not persistent. Includes nasal emission.                                                      | 2 = of significant clinical concern, 1 = of mild clinical concern, 0 = of no clinical concern, 9 = no opportunity |

| Feature category                                      | Subordinate features (if selected as present)   | Definitions                                                                                                                                                                                                                                             | Rating                                                                                                            |
|-------------------------------------------------------|-------------------------------------------------|---------------------------------------------------------------------------------------------------------------------------------------------------------------------------------------------------------------------------------------------------------|-------------------------------------------------------------------------------------------------------------------|
| Respiration, voice or resonance errors<br>(continued) | Hyponasal (consistent)                          | Hyponasality (too little nasal airflow) occurs consistently and persists across all consonants and vowels.                                                                                                                                              | 2 = of significant clinical concern, 1 = of mild clinical concern, 0 = of no clinical concern, 9 = no opportunity |
|                                                       | Hyponasal (intermittent)                        | Hypernasality is present occasionally or intermittently on Cs and/or Vs, but is not persistent.                                                                                                                                                         | 2 = of significant clinical concern, 1 = of mild clinical concern, 0 = of no clinical concern, 9 = no opportunity |
|                                                       | Cul-de-sac resonance                            | Too little airflow out of the mouth and nose perceptually sounding muffled and like sounds are trapped in a person's throat.                                                                                                                            | 2 = of significant clinical concern, 1 = of mild clinical concern, 0 = of no clinical concern, 9 = no opportunity |
| Inappropriate lexical stress                          | Excess stress or <i>consistent</i> equal stress | Weak syllables are lengthened, louder or higher so that they are equal to strong syllables and/or syllables are lengthened, louder or higher than appropriate (excess).                                                                                 | 2 = of significant clinical concern, 1 = of mild clinical concern, 0 = of no clinical concern, 9 = no opportunity |
|                                                       | <i>Inconsistent</i> equal stress                | Intermittently having no relative difference between weak and strong syllables (i.e. weak syllables produced longer, louder or higher to match strong syllables.) NOTE: does not include weak syllable deletion. This is included in structural errors. | 2 = of significant clinical concern, 1 = of mild clinical concern, 0 = of no clinical concern, 9 = no opportunity |
|                                                       | Other stress errors                             | A stress error that does not fit in the other categories - e.g. producing strong syllables as a weak syllable.                                                                                                                                          | 2 = of significant clinical concern, 1 = of mild clinical concern, 0 = of no clinical concern, 9 = no opportunity |
| Inappropriate phrasal stress and intonation           | Atypical intonation                             | Intonation inappropriate for content of phrase/sentence. NOTE: Doesn't include emphatic stress.                                                                                                                                                         | 2 = of significant clinical concern, 1 = of mild clinical concern, 0 = of no clinical concern, 9 = no opportunity |
|                                                       | Too little emphatic stress                      | "Flat" intonation contour.                                                                                                                                                                                                                              | 2 = of significant clinical concern, 1 = of mild clinical concern, 0 = of no clinical concern, 9 = no opportunity |
|                                                       | Too much emphatic stress                        | Emphasized words overly stressed within phrase/sentence.                                                                                                                                                                                                | 2 = of significant clinical concern, 1 = of mild clinical concern, 0 = of no clinical concern, 9 = no opportunity |
| Structural errors                                     | Weak syllable deletion                          | Unstressed syllables omitted.                                                                                                                                                                                                                           | 2 = of significant clinical concern, 1 = of mild clinical concern, 0 = of no clinical concern, 9 = no opportunity |
|                                                       | Added syllables/sounds                          | Syllables/sounds epenthesized inappropriately (not dialectal).                                                                                                                                                                                          | 2 = of significant clinical concern, 1 = of mild clinical concern, 0 = of no clinical concern, 9 = no opportunity |
|                                                       | Onset deletion                                  | Initial consonant or all members of a cluster are omitted.                                                                                                                                                                                              | 2 = of significant clinical concern, 1 = of mild clinical concern, 0 = of no clinical concern, 9 = no opportunity |
|                                                       | Final Consonant / Coda Deletion                 | Final consonant or coda omitted (not dialect-appropriate)                                                                                                                                                                                               | 2 = of significant clinical concern, 1 = of mild clinical concern, 0 = of no clinical concern, 9 = no opportunity |
|                                                       | Cluster reduction                               | Consonant omitted from sequence of 2-3 consonants                                                                                                                                                                                                       | 2 = of significant clinical concern, 1 = of mild clinical concern, 0 = of no clinical concern, 9 = no opportunity |
|                                                       | Metathesis/Migration                            | Consonants or vowels in inappropriate order                                                                                                                                                                                                             | 2 = of significant clinical concern, 1 = of mild clinical concern, 0 = of no clinical concern, 9 = no opportunity |
| Segmental errors                                      | Limited consonant inventory                     | Fewer consonants in repertoire than expected for age (regardless of appropriateness of <b>which</b> consonants the child has)                                                                                                                           | 2 = of significant clinical concern, 1 = of mild clinical concern, 0 = of no clinical concern, 9 = no opportunity |
|                                                       | Typical consonant substitution patterns         | Substitution errors consistent with typical development, but delayed.                                                                                                                                                                                   | 2 = of significant clinical concern, 1 = of mild clinical concern, 0 = of no clinical concern, 9 = no opportunity |

| Feature category                       | Subordinate features (if selected as present)                         | Definitions                                                                                                                            | Rating                                                                                                            |
|----------------------------------------|-----------------------------------------------------------------------|----------------------------------------------------------------------------------------------------------------------------------------|-------------------------------------------------------------------------------------------------------------------|
| <b>Segmental errors</b><br>(continued) | Atypical consonant substitution patterns                              | Substitutions do not typically occur earlier in development among TD children                                                          | 2 = of significant clinical concern, 1 = of mild clinical concern, 0 = of no clinical concern, 9 = no opportunity |
|                                        | Consistent distortions of later-developing sounds                     | Distortions of sibilants, liquids, palatals (e.g. [r], [s], [tʃ])                                                                      | 2 = of significant clinical concern, 1 = of mild clinical concern, 0 = of no clinical concern, 9 = no opportunity |
|                                        | Vowel substitution errors                                             | Substituting one or more vowels with another vowel (e.g. saying [ʒ] as [ɔ]) or diphthongs as a monophong.                              | 2 = of significant clinical concern, 1 = of mild clinical concern, 0 = of no clinical concern, 9 = no opportunity |
|                                        | Distortion vowel errors                                               | Distortion of monothongs or diphthongs. PLEASE NOTE: lengthening errors are not included here and instead would affect lexical stress. | 2 = frequently present, 1 = infrequently present, 0 = not present, 9 = no opportunity                             |
|                                        | Sound acquisition out of order re: typical development                | Consonant and/or vowel repertoire inappropriate for the child's age in (e.g. child has acquired [tʃ] but not [t]).                     | 2 = frequently present, 1 = infrequently present, 0 = not present, 9 = no opportunity                             |
| <b>Language issues</b>                 | Semantic deficits and/or word-finding problems (e.g., mazes, fillers) | Less specific vocabulary than expected for their age and/or use of mazes and fillers.                                                  | 2 = frequently present, 1 = infrequently present, 0 = not present, 9 = no opportunity                             |
|                                        | Morphosyntax difficulties                                             | Grammatical errors (including omissions, misorderings) of any type relative to the child's age.                                        | 2 = of significant clinical concern, 1 = of mild clinical concern, 0 = of no clinical concern, 9 = no opportunity |
|                                        | Pragmatic difficulties                                                | Inappropriate social interactions relative to the child's age.                                                                         | 2 = of significant clinical concern, 1 = of mild clinical concern, 0 = of no clinical concern, 9 = no opportunity |
| <b>Dysfluency</b>                      | False starts / restarts                                               | Sentences abandoned then restarted.                                                                                                    | 2 = of significant clinical concern, 1 = of mild clinical concern, 0 = of no clinical concern, 9 = no opportunity |
|                                        | Repetitions (sounds, syllables or words)                              | Repeating sounds (b-b-b-bottle), syllables (bo-bo-bo-ttle) or words (bottle bottle bottle)                                             | 2 = of significant clinical concern, 1 = of mild clinical concern, 0 = of no clinical concern, 9 = no opportunity |
|                                        | Blocks                                                                | Appears to get "stuck" on certain sounds and the person cannot move past it voluntarily.                                               | 2 = of significant clinical concern, 1 = of mild clinical concern, 0 = of no clinical concern, 9 = no opportunity |
|                                        | Prolongations                                                         | The first sound or syllable of a word is sustained and the person cannot move past it voluntarily.                                     | 2 = of significant clinical concern, 1 = of mild clinical concern, 0 = of no clinical concern, 9 = no opportunity |
