# Supplementary material
Source: publisher figshare collection journal article supplement (https://asha.figshare.com/articles/dataset/_/23949105)
Supplement: Supplementary file 2 [file 1]

## Supplemental Material S2. Rating instructions.

### Reliability of expert diagnosis of apraxia of speech in children. Rating instructions.

#### When listening to the samples please:

1. Use over-the-ear headphones that can plug into your computer. Please do not use ear buds or Bluetooth connected headphones. If you need recommendations of earphones to use, please email [cas.study@sydney.edu.au](mailto:cas.study@sydney.edu.au)
2. When listening to the samples, please adjust the speaker volume to a comfortable level. Note that all samples have been normalized to 70dB. Therefore, if samples seem to be soft or loud, it is because of the child's vocal intensity or distance from the microphone (as seen in videos of young children) and not due to the recording.
3. Read the rating form below complete with a glossary of terms. The terms are also defined in the survey – if you hover your mouse over a term, the definition will appear.
4. For each child, there will be several audio or video files to listen to. Each file represents a different speech task which is identified in the file name of the file. Not all of the children participated in exactly the same data collection protocol, so be aware that there may be some differences in the tasks that you listen to. Within the excel rating pack you are given, there are also links to the word lists for each task in case you need them.
5. Listen to all files in order please. Please note one file in every set of 10 will be a repeat of another file you have previously rated so we can rate intra-rater reliability.
6. You are welcome to go back and listen to specific files (speech tasks) again once more for your ratings. Please listen to each file a maximum of 2 times.
7. Do not transcribe while listening. Instead focus on listening and completing the rating form. You can take brief notes of key observations to help you complete the online form if you wish.
8. Rate each symptom individually. Ask yourself: "If I were only attending to this symptom - would I treat it?" to make decisions on the clinical significance of each feature.
9. Please rate every diagnosis that you feel applies to the child you are listening to. For example, if a child has CAS and articulation disorder / speech errors – please indicate that the child has both diagnoses. Please note that CAS may be present in all the files you have, in none of the files you have, or somewhere in between. Do not assume that a proportion of files necessarily represent children with CAS. The files have been randomly selected from a large pool of samples.
10. If you feel that there is a likely other diagnosis (that would need to be confirmed with further assessment), please note this as an 'other' possible diagnosis. If you suspect there may be something else happening but don't feel it is enough to warrant another possible diagnosis, there is a text box later in the form in which you can remark.
11. We recommend you listen to no more than 3 children's samples in a row without a break.
12. If you have any questions as you rate that are affecting your ability to complete the task, please email [cas.study@sydney.edu.au](mailto:cas.study@sydney.edu.au) for assistance.
13. Once you have completed your training rating set (=2 children), please complete the finished survey so we can organize payment of your \$50 training honorarium and for your next ratings: one set of samples = 9 children (plus a repeated child for intra-rater reliability). On completion of this you will receive \$150 as an honorarium and your second set of 10 samples.

*Thank you very much for your time and expertise.*
