# Supplementary material
Source: publisher figshare collection journal article supplement (https://asha.figshare.com/articles/dataset/_/23949105)
Supplement: Supplementary file 4 [file 1]

**Supplemental Material S4.** Spearman correlations between features and the likelihood of CAS (averaged across three raters for each child's sample).

|                |                                                                                                            | Average rated<br>likelihood child<br>has CAS 0-100 |        |
|----------------|------------------------------------------------------------------------------------------------------------|----------------------------------------------------|--------|
| Spearman's rho | Inconsistency observed<br>number of raters 0 to 3                                                          | Correlation Coefficient                            | .658** |
|                |                                                                                                            | Sig. (2-tailed)                                    | .000   |
|                |                                                                                                            | N                                                  | 90     |
|                | Inconsistency clinically<br>significant number of rater 0<br>to 3                                          | Correlation Coefficient                            | .578** |
|                |                                                                                                            | Sig. (2-tailed)                                    | .000   |
|                |                                                                                                            | N                                                  | 90     |
|                | Lengthened and disrupted<br>coarticulatory transitions<br>observed number of raters 0<br>to 3              | Correlation Coefficient                            | .647** |
|                |                                                                                                            | Sig. (2-tailed)                                    | .000   |
|                |                                                                                                            | N                                                  | 90     |
|                | Lengthened and disrupted<br>coarticulatory transitions<br>clinically significant<br>number of rater 0 to 3 | Correlation Coefficient                            | .625** |
|                |                                                                                                            | Sig. (2-tailed)                                    | .000   |
|                |                                                                                                            | N                                                  | 90     |
|                | Respiration, voice or<br>resonance errors observed<br>number of raters 0 to 3                              | Correlation Coefficient                            | .452** |
|                |                                                                                                            | Sig. (2-tailed)                                    | .000   |
|                |                                                                                                            | N                                                  | 90     |
|                | Respiration, voice or<br>resonance errors clinically<br>significant number of rater 0<br>to 3              | Correlation Coefficient                            | .492** |
|                |                                                                                                            | Sig. (2-tailed)                                    | .000   |
|                |                                                                                                            | N                                                  | 90     |
|                | Inappropriate lexical stress<br>observed number of raters 0<br>to 3                                        | Correlation Coefficient                            | .610** |
|                |                                                                                                            | Sig. (2-tailed)                                    | .000   |
|                |                                                                                                            | N                                                  | 90     |
|                | Inappropriate lexical stress<br>clinically significant<br>number of rater 0 to 3                           | Correlation Coefficient                            | .580** |
|                |                                                                                                            | Sig. (2-tailed)                                    | .000   |
|                |                                                                                                            | N                                                  | 90     |
|                | Inappropriate phrasal stress<br>or intonation observed<br>number of raters 0 to 3                          | Correlation Coefficient                            | .618** |
|                |                                                                                                            | Sig. (2-tailed)                                    | .000   |
|                |                                                                                                            | N                                                  | 90     |
|                | Inappropriate phrasal stress<br>or intonation clinically                                                   | Correlation Coefficient                            | .504** |
|                |                                                                                                            | Sig. (2-tailed)                                    | .000   |

|                                                                                                |                         |        |
|------------------------------------------------------------------------------------------------|-------------------------|--------|
| significant number of rater 0 to 3                                                             | N                       | 90     |
| Structural (word shape) errors observed number of raters 0 to 3                                | Correlation Coefficient | .434** |
|                                                                                                | Sig. (2-tailed)         | .000   |
|                                                                                                | N                       | 90     |
| Structural (word shape) errors clinically significant number of rater 0 to 3                   | Correlation Coefficient | .537** |
|                                                                                                | Sig. (2-tailed)         | .000   |
|                                                                                                | N                       | 90     |
| Segmental errors (consonant and/or vowel errors) observed number of raters 0 to 3              | Correlation Coefficient | .212*  |
|                                                                                                | Sig. (2-tailed)         | .045   |
|                                                                                                | N                       | 90     |
| Segmental errors (consonant and/or vowel errors) clinically significant number of rater 0 to 3 | Correlation Coefficient | .344** |
|                                                                                                | Sig. (2-tailed)         | .001   |
|                                                                                                | N                       | 90     |
| Language issues observed number of raters 0 to 3                                               | Correlation Coefficient | .520** |
|                                                                                                | Sig. (2-tailed)         | .000   |
|                                                                                                | N                       | 90     |
| Language issues clinically significant number of rater 0 to 3                                  | Correlation Coefficient | .308** |
|                                                                                                | Sig. (2-tailed)         | .003   |
|                                                                                                | N                       | 90     |
| Dysfluency observed number of raters 0 to 3                                                    | Correlation Coefficient | .122   |
|                                                                                                | Sig. (2-tailed)         | .252   |
|                                                                                                | N                       | 90     |
| Dysfluency clinically significant number of rater 0 to 3                                       | Correlation Coefficient | -.031  |
|                                                                                                | Sig. (2-tailed)         | .772   |
|                                                                                                | N                       | 90     |
| Avoiding words/sounds observed number of raters 0 to 3                                         | Correlation Coefficient | .304** |
|                                                                                                | Sig. (2-tailed)         | .004   |
|                                                                                                | N                       | 90     |
| Avoiding words/sounds clinically significant number of rater 0 to 3                            | Correlation Coefficient | .137   |
|                                                                                                | Sig. (2-tailed)         | .199   |
|                                                                                                | N                       | 90     |
