# Supplementary material
Source: publisher figshare collection journal article supplement (https://asha.figshare.com/articles/dataset/_/23949105)
Supplement: Supplementary file 5 [file 1]

**Supplemental Material S1. Qualtrics rating form.**

Tools ▾ Saved at 10:36 AM Draft

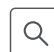

Preview

Publish

FINAL Master copy\_Reliability of expert diagnosis of CAS -

ExpertReview score

Fair

## ▼ Reliability of expert diagnosis of CAS survey

Q38

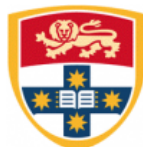THE UNIVERSITY OF  
SYDNEY

...

Q41

**Rating speech samples to determine diagnosis**

You have been invited to complete this rating form as you are (a) an expert in CAS diagnosis with both clinical and research experience and (b) you have consented to be a participant in this rating study by completing a separate consent form.

This research has been approved by the University of Sydney Human Research Ethics Committee (approval number: 2019/270). If you have any concerns about this research at any time, please contact [human.ethics@sydney.edu.au](mailto:human.ethics@sydney.edu.au). If you have any concerns about using the form, please contact us at [cas.study@sydney.edu.au](mailto:cas.study@sydney.edu.au).

**Instructions:**

- Please read the rating form instructions, feature definitions and watch the online rating form video if you have not already. Links to these are in your rating excel spreadsheet
- Complete ONE rating form per participant
- Listen/ watch one participant's responses to assessment tasks in entirety before attempting the rating form
- Only listen / watch each task a maximum of TWO times to ensure consistency across raters.

Please note that CAS may or may not be present in the samples. There is no quota of children present for any diagnosis, so please just rate what you hear / see.

*Thank you for your time and expertise in completing this survey.*

▲

Import from library

Add new question

[Add Block](#)

## ▼ Rating information

Q40

Please read the following information to help you rate the child's speech

Q9

⚡ ☆

Your participant number

Q31

⚡ ☆

Your dialect of English

Q8

Participant identifier: XXXXX

Elizabeth Murray  
4 May 2018 8:17pm

We need to populate the participant numbers here before we go live

×

Hide Discussion

Add a Comment

Q9

Age of the child: XX years, XX months

Q33

Gender of the child: MALE / FEMALE

Q32

English dialect of the child: XX ENGLISH

Feature rating

Q1

What features does the child have in their communication?

|                                                           | Of <u>significant</u><br>clinical concern | Of <u>mild</u> clinical<br>concern | Of <u>no</u> clinical<br>concern | No opportunity        |
|-----------------------------------------------------------|-------------------------------------------|------------------------------------|----------------------------------|-----------------------|
| Inconsistency                                             | <input type="radio"/>                     | <input type="radio"/>              | <input type="radio"/>            | <input type="radio"/> |
| Lengthened and<br>disrupted coarticulatory<br>transitions | <input type="radio"/>                     | <input type="radio"/>              | <input type="radio"/>            | <input type="radio"/> |
| Respiration, voice or<br>resonance errors                 | <input type="radio"/>                     | <input type="radio"/>              | <input type="radio"/>            | <input type="radio"/> |
| Inappropriate lexical<br>stress                           | <input type="radio"/>                     | <input type="radio"/>              | <input type="radio"/>            | <input type="radio"/> |
| Inappropriate phrasal<br>stress or intonation             | <input type="radio"/>                     | <input type="radio"/>              | <input type="radio"/>            | <input type="radio"/> |
| Structural errors (word<br>shape errors)                  | <input type="radio"/>                     | <input type="radio"/>              | <input type="radio"/>            | <input type="radio"/> |
| Segmental errors<br>(consonant and/or<br>vowel errors)    | <input type="radio"/>                     | <input type="radio"/>              | <input type="radio"/>            | <input type="radio"/> |
| Language concerns                                         | <input type="radio"/>                     | <input type="radio"/>              | <input type="radio"/>            | <input type="radio"/> |
| Dysfluency                                                | <input type="radio"/>                     | <input type="radio"/>              | <input type="radio"/>            | <input type="radio"/> |
| Avoiding words/sounds<br>in assessment tasks              | <input type="radio"/>                     | <input type="radio"/>              | <input type="radio"/>            | <input type="radio"/> |

Page Break

Q15

Display this question

If What features does the child have in their communication? Inconsistency - Of significant clinical concern Is Selected

Or What features does the child have in their communication? Inconsistency - Of mild clinical concern Is Selected

Please rate their specific inconsistency features:

|                                                                                                                                      | Of <u>significant</u><br>clinical concern | Of <u>mild</u> clinical<br>concern | Of <u>no</u> clinical<br>concern | No opportunity        |
|--------------------------------------------------------------------------------------------------------------------------------------|-------------------------------------------|------------------------------------|----------------------------------|-----------------------|
| Inconsistent<br>substitutions or<br>distortions of<br>consonants and/or<br>vowels across repeated<br>productions of a<br>word/phrase | <input type="radio"/>                     | <input type="radio"/>              | <input type="radio"/>            | <input type="radio"/> |
| Variable productions of<br>consonants across a<br>variety of words                                                                   | <input type="radio"/>                     | <input type="radio"/>              | <input type="radio"/>            | <input type="radio"/> |

Page Break

Q16

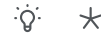

▼ [Display this question](#)

If What features does the child have in their communication? Lengthened and disrupted coarticulatory transitions - Of <u>significant</u> clinical concern Is Selected

Or What features does the child have in their communication? Lengthened and disrupted coarticulatory transitions - Of <u>mild</u> clinical concern Is Selected

Please rate their specific lengthened and disrupted coarticulatory transition features:

|                                                           | Of <u>significant</u><br>clinical concern | Of <u>mild</u> clinical<br>concern | Of <u>no</u> clinical<br>concern | No opportunity        |
|-----------------------------------------------------------|-------------------------------------------|------------------------------------|----------------------------------|-----------------------|
| Difficulty achieving initial configuration/speech groping | <input type="radio"/>                     | <input type="radio"/>              | <input type="radio"/>            | <input type="radio"/> |
| Syllable segregation (inappropriate within-word pauses)   | <input type="radio"/>                     | <input type="radio"/>              | <input type="radio"/>            | <input type="radio"/> |
| Inappropriate pauses between words                        | <input type="radio"/>                     | <input type="radio"/>              | <input type="radio"/>            | <input type="radio"/> |
| Increasing difficulty with longer/ more complex words     | <input type="radio"/>                     | <input type="radio"/>              | <input type="radio"/>            | <input type="radio"/> |
| Articulatory errors or sequencing errors <b>on DDK</b>    | <input type="radio"/>                     | <input type="radio"/>              | <input type="radio"/>            | <input type="radio"/> |
| Slow / effortful <b>DDK</b>                               | <input type="radio"/>                     | <input type="radio"/>              | <input type="radio"/>            | <input type="radio"/> |

----- Page Break -----

Q18

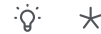

▼ [Display this question](#)

If What features does the child have in their communication? Respiration, voice or resonance errors - Of <u>significant</u> clinical concern Is Selected

Or What features does the child have in their communication? Respiration, voice or resonance errors - Of <u>mild</u> clinical concern Is Selected

Please rate their specific voice and resonance features:

|                                    | Of <u>significant</u><br>clinical concern | Of <u>mild</u> clinical<br>concern | Of <u>no</u> clinical<br>concern | No opportunity        |
|------------------------------------|-------------------------------------------|------------------------------------|----------------------------------|-----------------------|
| Respiration problems               | <input type="radio"/>                     | <input type="radio"/>              | <input type="radio"/>            | <input type="radio"/> |
| Hoarse, harsh and/or breathy voice | <input type="radio"/>                     | <input type="radio"/>              | <input type="radio"/>            | <input type="radio"/> |
| Age-inappropriate pitch            | <input type="radio"/>                     | <input type="radio"/>              | <input type="radio"/>            | <input type="radio"/> |
| Age-inappropriate loudness         | <input type="radio"/>                     | <input type="radio"/>              | <input type="radio"/>            | <input type="radio"/> |
| Pitch breaks                       | <input type="radio"/>                     | <input type="radio"/>              | <input type="radio"/>            | <input type="radio"/> |
| Hypernasal (consistent)            | <input type="radio"/>                     | <input type="radio"/>              | <input type="radio"/>            | <input type="radio"/> |
| Hypernasal (intermittent)          | <input type="radio"/>                     | <input type="radio"/>              | <input type="radio"/>            | <input type="radio"/> |
| Hyponasal (consistent)             | <input type="radio"/>                     | <input type="radio"/>              | <input type="radio"/>            | <input type="radio"/> |
| Hyponasal (intermittent)           | <input type="radio"/>                     | <input type="radio"/>              | <input type="radio"/>            | <input type="radio"/> |
| Cul-de-sac resonance               | <input type="radio"/>                     | <input type="radio"/>              | <input type="radio"/>            | <input type="radio"/> |

----- Page Break -----

Q17



▼ [Display this question](#)

If What features does the child have in their communication? Inappropriate lexical stress - Of <u>significant </u>clinical concern Is Selected

Or What features does the child have in their communication? Inappropriate lexical stress - Of <u>mild</u> clinical concern Is Selected

Please rate their specific inappropriate lexical stress features:

|                                             | Of <u>significant</u><br>clinical concern | Of <u>mild</u> clinical<br>concern | Of <u>no</u> clinical<br>concern | No opportunity        |
|---------------------------------------------|-------------------------------------------|------------------------------------|----------------------------------|-----------------------|
| Excess stress or<br>consistent equal stress | <input type="radio"/>                     | <input type="radio"/>              | <input type="radio"/>            | <input type="radio"/> |
| Inconsistent equal<br>stress                | <input type="radio"/>                     | <input type="radio"/>              | <input type="radio"/>            | <input type="radio"/> |
| Other stress errors                         | <input type="radio"/>                     | <input type="radio"/>              | <input type="radio"/>            | <input type="radio"/> |

Q41

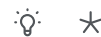

▼ [Display this question](#)

If What features does the child have in their communication? Inappropriate lexical stress - Of <u>significant </u>clinical concern Is Selected

Or What features does the child have in their communication? Inappropriate lexical stress - Of <u>mild</u> clinical concern Is Selected

Please rate their specific inappropriate phrasal stress and intonation features:

|                               | Of <u>significant</u><br>clinical concern | Of <u>mild</u> clinical<br>concern | Of <u>no</u> clinical<br>concern | No opportunity        |
|-------------------------------|-------------------------------------------|------------------------------------|----------------------------------|-----------------------|
| Atypical intonation           | <input type="radio"/>                     | <input type="radio"/>              | <input type="radio"/>            | <input type="radio"/> |
| Too little emphatic<br>stress | <input type="radio"/>                     | <input type="radio"/>              | <input type="radio"/>            | <input type="radio"/> |
| Too much emphatic<br>stress   | <input type="radio"/>                     | <input type="radio"/>              | <input type="radio"/>            | <input type="radio"/> |

----- Page Break -----

Q19

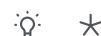

▼ [Display this question](#)

If What features does the child have in their communication? Structural errors (word shape errors) - Of <u>significant </u>clinical concern Is Selected

Or What features does the child have in their communication? Structural errors (word shape errors) - Of <u>mild</u> clinical concern Is Selected

Please rate their specific structural speech features:

|                             | Of <u>significant</u><br>clinical concern | Of <u>mild</u> clinical<br>concern | Of <u>no</u> clinical<br>concern | No opportunity        |
|-----------------------------|-------------------------------------------|------------------------------------|----------------------------------|-----------------------|
| Weak syllable deletion      | <input type="radio"/>                     | <input type="radio"/>              | <input type="radio"/>            | <input type="radio"/> |
| Added syllables/sounds      | <input type="radio"/>                     | <input type="radio"/>              | <input type="radio"/>            | <input type="radio"/> |
| Onset deletion              | <input type="radio"/>                     | <input type="radio"/>              | <input type="radio"/>            | <input type="radio"/> |
| Final Consonant<br>Deletion | <input type="radio"/>                     | <input type="radio"/>              | <input type="radio"/>            | <input type="radio"/> |
| Cluster Reduction           | <input type="radio"/>                     | <input type="radio"/>              | <input type="radio"/>            | <input type="radio"/> |
| Metathesis/Migration        | <input type="radio"/>                     | <input type="radio"/>              | <input type="radio"/>            | <input type="radio"/> |

Q20

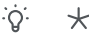

▼ [Display this question](#)

If What features does the child have in their communication? Segmental errors (consonant and/or vowel errors) - Of <u>significant </u>clinical concern Is Selected

Or What features does the child have in their communication? Segmental errors (consonant and/or vowel errors) - Of <u>mild</u> clinical concern Is Selected

Please rate their specific segmental error features:

|                                                        | Of <u>significant</u><br>clinical concern | Of <u>mild</u> clinical<br>concern | Of <u>no</u> clinical<br>concern | No opportunity        |
|--------------------------------------------------------|-------------------------------------------|------------------------------------|----------------------------------|-----------------------|
| Limited consonant inventory                            | <input type="radio"/>                     | <input type="radio"/>              | <input type="radio"/>            | <input type="radio"/> |
| Typical consonant substitutions                        | <input type="radio"/>                     | <input type="radio"/>              | <input type="radio"/>            | <input type="radio"/> |
| Atypical consonant substitutions                       | <input type="radio"/>                     | <input type="radio"/>              | <input type="radio"/>            | <input type="radio"/> |
| Consistent distortions of later- developing sounds     | <input type="radio"/>                     | <input type="radio"/>              | <input type="radio"/>            | <input type="radio"/> |
| Vowel substitution errors                              | <input type="radio"/>                     | <input type="radio"/>              | <input type="radio"/>            | <input type="radio"/> |
| Vowel distortion errors                                | <input type="radio"/>                     | <input type="radio"/>              | <input type="radio"/>            | <input type="radio"/> |
| Sound acquisition out of order re: typical development | <input type="radio"/>                     | <input type="radio"/>              | <input type="radio"/>            | <input type="radio"/> |

Page Break

Q21

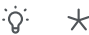

▼ [Display this question](#)

If What features does the child have in their communication? Language concerns - Of <u>significant </u>clinical concern Is Selected

Or What features does the child have in their communication? Language concerns - Of <u>mild</u> clinical concern Is Selected

Please rate their specific language features:

|                                                                       | Of <u>significant</u><br>clinical concern | Of <u>mild</u> clinical<br>concern | Of <u>no</u> clinical<br>concern | No opportunity        |
|-----------------------------------------------------------------------|-------------------------------------------|------------------------------------|----------------------------------|-----------------------|
| Semantic deficits and/or word-finding problems (e.g., mazes, fillers) | <input type="radio"/>                     | <input type="radio"/>              | <input type="radio"/>            | <input type="radio"/> |
| Morphosyntax deficits                                                 | <input type="radio"/>                     | <input type="radio"/>              | <input type="radio"/>            | <input type="radio"/> |
| Pragmatic deficits                                                    | <input type="radio"/>                     | <input type="radio"/>              | <input type="radio"/>            | <input type="radio"/> |

Page Break

Q22

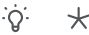

▼ Display this question

If What features does the child have in their communication? Dysfluency - Of <u>significant </u>clinical concern Is Selected

Or What features does the child have in their communication? Dysfluency - Of <u>mild</u> clinical concern Is Selected

Please rate their specific fluency features:

|                                      | Of <u>significant</u><br>clinical concern | Of <u>mild</u> clinical<br>concern | Of <u>no</u> clinical<br>concern | No opportunity        |
|--------------------------------------|-------------------------------------------|------------------------------------|----------------------------------|-----------------------|
| False starts                         | <input type="radio"/>                     | <input type="radio"/>              | <input type="radio"/>            | <input type="radio"/> |
| Sound, syllable, word<br>repetitions | <input type="radio"/>                     | <input type="radio"/>              | <input type="radio"/>            | <input type="radio"/> |
| Blocks                               | <input type="radio"/>                     | <input type="radio"/>              | <input type="radio"/>            | <input type="radio"/> |
| Prolongations                        | <input type="radio"/>                     | <input type="radio"/>              | <input type="radio"/>            | <input type="radio"/> |

Page Break

Q25

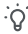

Please list any other features you observed that you feel are important in diagnosing this child.

For example, did you notice any poor response to the clinician (e.g., reluctance to complete tasks, perseveration on the last task/ topic) or inattention (e.g., fidgeting in the child's chair, moving restlessly, looking away from the clinician).

Q35

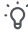

What tasks were particularly helpful in diagnosing this child?

Q34

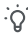

Please post any further notes you have here

Import from library

Add new question

Add Block

▼ Diagnosis

Q2

★

What is the child's diagnosis?

- ☐ Childhood apraxia of speech (CAS)
- ☐ CAS + other disorder/s
- ☐ Other disorders

Q36

What is the likelihood the child has:

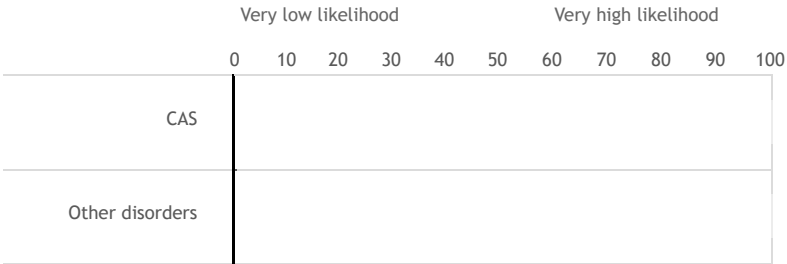

Q3

★

▼ [Display this question](#)

If **What is the child's diagnosis?** **CAS + other disorder/s** Is Selected  
Or **What is the child's diagnosis?** **Other disorders** Is Selected

As you selected CAS + other disorders or 'other disorders' in your original diagnosis, please specify what diagnoses you feel the child may have (i.e. that you would want to assess further) from the list below:

- ☐ Developmental language disorder
- ☐ Phonological impairment
- ☐ Inconsistent phonological impairment
- ☐ Stuttering
- ☐ Childhood dysarthria
- ☐ Voice disorder
- ☐ Articulation disorder/ speech errors
- ☐ Cognitive or overall developmental concerns
- ☐ Other, please specify



Q4

 

Please specify the potential severity of each diagnosis present below:

|                                             | Severe                | Moderate              | Mild                  | Not applicable        |
|---------------------------------------------|-----------------------|-----------------------|-----------------------|-----------------------|
| Childhood apraxia of speech                 | <input type="radio"/> | <input type="radio"/> | <input type="radio"/> | <input type="radio"/> |
| Developmental language disorder             | <input type="radio"/> | <input type="radio"/> | <input type="radio"/> | <input type="radio"/> |
| Phonological impairment                     | <input type="radio"/> | <input type="radio"/> | <input type="radio"/> | <input type="radio"/> |
| Inconsistent phonological impairment        | <input type="radio"/> | <input type="radio"/> | <input type="radio"/> | <input type="radio"/> |
| Stuttering                                  | <input type="radio"/> | <input type="radio"/> | <input type="radio"/> | <input type="radio"/> |
| Childhood dysarthria                        | <input type="radio"/> | <input type="radio"/> | <input type="radio"/> | <input type="radio"/> |
| Voice disorder                              | <input type="radio"/> | <input type="radio"/> | <input type="radio"/> | <input type="radio"/> |
| Articulation disorder/ speech errors        | <input type="radio"/> | <input type="radio"/> | <input type="radio"/> | <input type="radio"/> |
| Cognitive or overall developmental concerns | <input type="radio"/> | <input type="radio"/> | <input type="radio"/> | <input type="radio"/> |
| Other, please specify                       | <input type="radio"/> | <input type="radio"/> | <input type="radio"/> | <input type="radio"/> |
| <input type="text"/>                        |                       |                       |                       |                       |

Q5



Please provide any comments (e.g. hunches of your diagnosis of this child) not captured elsewhere below



- Q26
- How confident are you in your diagnosis of this child?
- ☐

 Highly confident
- ☐

 Confident
- ☐

 Unsure
- ☐

 Highly unsure

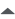

 Import from library

Add new question

Add Block

End of Survey

Thank you for completing this rating.
